# Supplementary material for: A Patient with Corticobasal Syndrome and Progressive Non-Fluent Aphasia (CBS-PNFA), with Variants in ATP7B, SETX, SORL1, and FOXP1 Genes
Source: MDPI journal article supplement (doi:10.3390/genes13122361), 2022-12-14
Supplement: s1 [file s1]

**Figure S2. Case timeline**

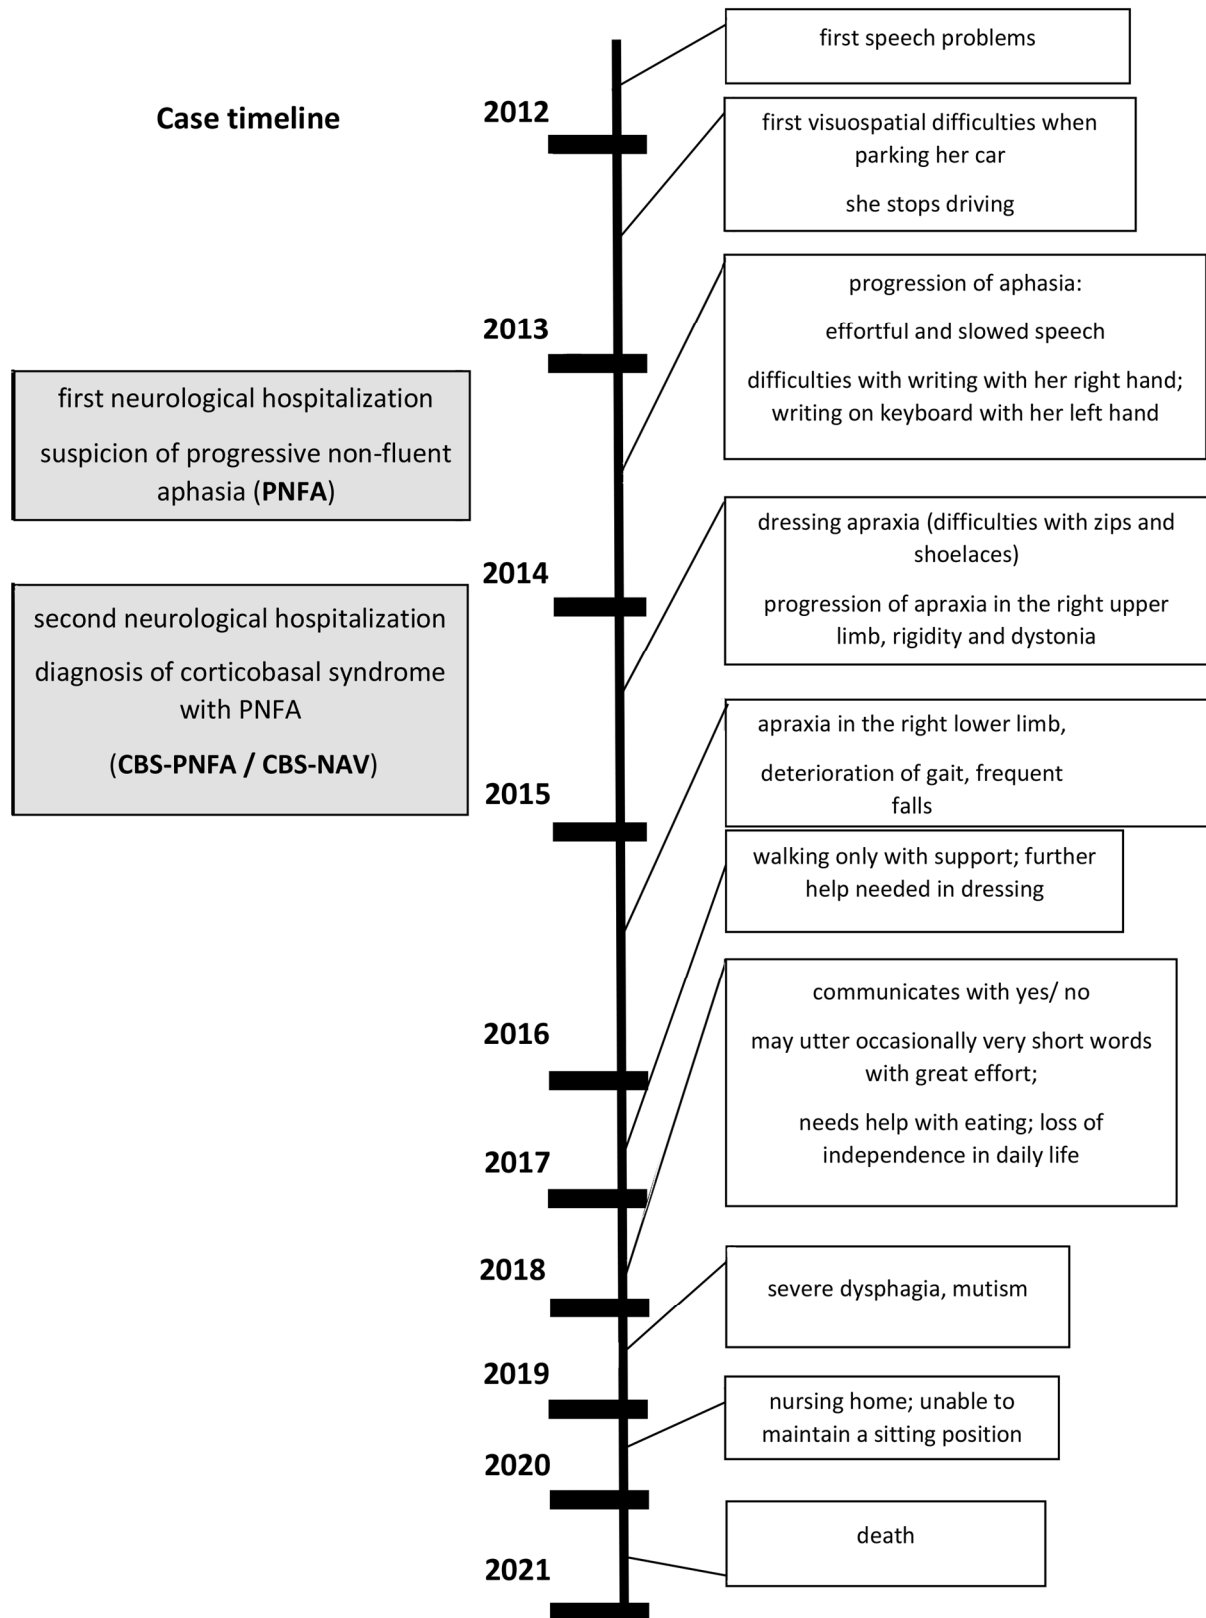

**Neuropsychological assessment Table S5.** Cognitive and behavioral screening test results in the proband (see also Fig. 1C,D)

|                                 | The patient's age – years, months |      |      |       |
|---------------------------------|-----------------------------------|------|------|-------|
|                                 | 67,2                              | 68,4 | 69,3 | 70,2* |
| MMSE / 30                       | 28                                | 25   | -    | -     |
| ACE-III / 100                   | -                                 | 70   | 56   | -     |
| ACE-III – attention / 18        | -                                 | 16   | 12   | -     |
| ACE-III – memory / 26           | -                                 | 19   | 16   | -     |
| ACE-III – fluency / 14          | -                                 | 1    | 0    | -     |
| ACE-III - language / 26         | -                                 | 22   | 20   | -     |
| ACE-III – visuospatial / 16     | -                                 | 12   | 8    | -     |
| FBI – negative behaviour score  | 10                                | 12   | -    | -     |
| FBI- disinhibition score        | 6                                 | 3    |      |       |
| FBI – total score (cut-off: 17) | 16                                | 15   |      |       |

ACE-III, Addenbrooke's Cognitive Examination-III; FBI, Frontal Behavioural Inventory; MMSE, Mini-Mental State Examination

\*not feasible due to severe speech apraxia

**Neuropsychological assessment Figure S3.** Profile of Addenbrooke's Cognitive Examination-III performance in the proband performed twice in the disease course

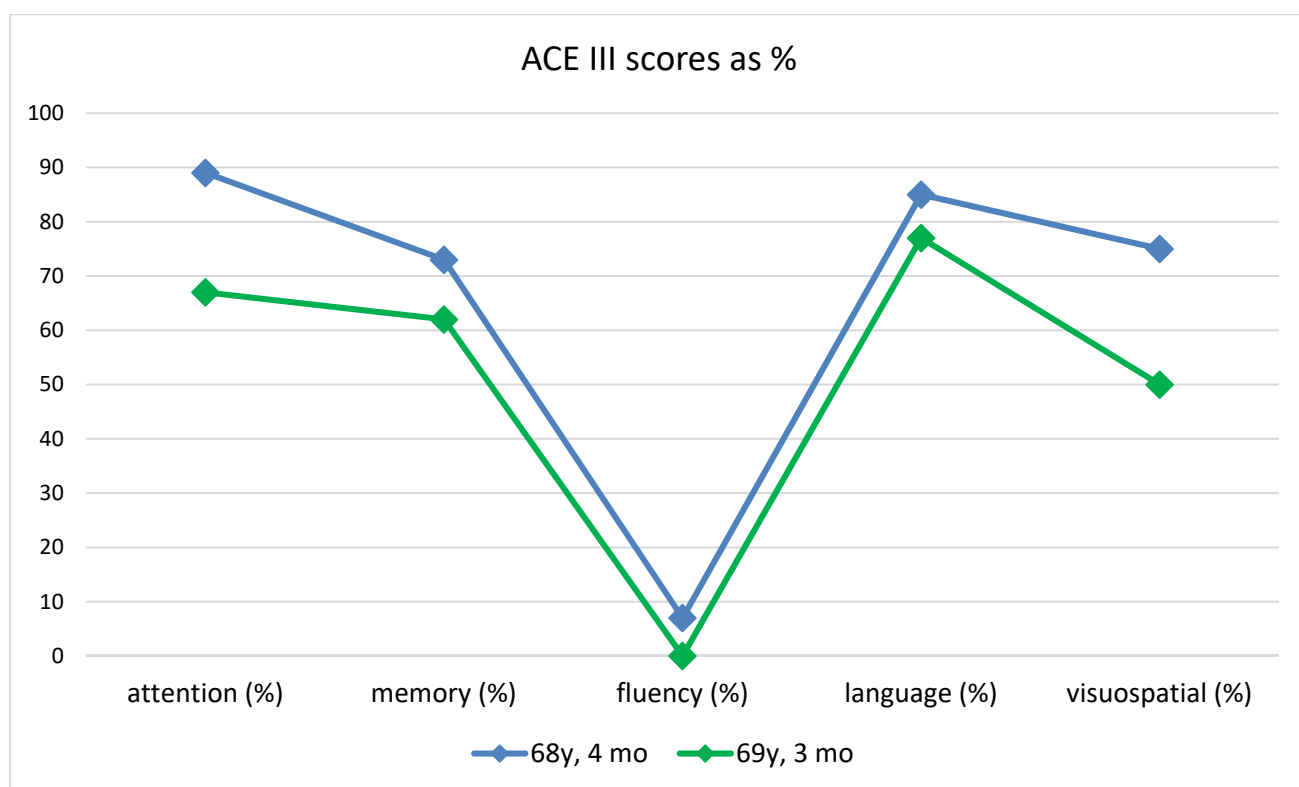

**Neuropsychological assessment Table S6.** Speech and language evaluation results in the proband

|                                                          | The patient's age – years, months |                                  |                          |                              |
|----------------------------------------------------------|-----------------------------------|----------------------------------|--------------------------|------------------------------|
|                                                          | 67,2                              | 68,4                             | 69,3                     | 70,2*                        |
| <b><i>Confrontation naming &amp; semantic memory</i></b> |                                   |                                  |                          |                              |
| BNT / 30                                                 | 26                                | 20                               | 17                       | -                            |
| SydBAT – Naming / 30                                     | 20                                | 20                               | 15                       | -                            |
| SydBAT – Word comprehension / 30                         | 29                                | 26                               | 26                       | 19                           |
| SydBAT – Semantic association / 30                       | 21                                | 24                               | 22                       | 19                           |
| PALS –naming - animals / 10                              | 10                                | 8                                | 8                        | -                            |
| PALS – word comprehension – animals / 10                 | 10                                | 10                               | 10                       | -                            |
| PALS – naming – objects / 10                             | 9                                 | 9                                | 8                        | -                            |
| PALS – word comprehension – objects / 10                 | 10                                | 10                               | 10                       | 10                           |
| <b><i>Verbal fluency</i></b>                             |                                   |                                  |                          |                              |
| Semantic fluency – animals / fruit and vegetables        | 6 / 5                             | 4 / 6                            | 2 / 2                    | -                            |
| Phonemic fluency – K / P / M / S                         | 2 / 4 / 2 / -                     | 2 / 1 / 2 / 2                    | 1 / 1 / 1 / 1            | -                            |
| <b><i>Language comprehension</i></b>                     |                                   |                                  |                          |                              |
| Commands from BDAE / 15                                  | 12                                | 13                               | 11                       | 11                           |
| Token Test / 163                                         | 138                               | 140                              | 123                      | 118                          |
| Understanding Polish grammatical constructions / 10      | 5                                 | 6                                | 5                        | -                            |
| <b><i>Repetition</i></b>                                 |                                   |                                  |                          |                              |
| Phrase repetition from BDAE                              | 7 / 8                             | 7 / 5                            | 7/6                      | -                            |
| High frequency / low frequency / 8                       |                                   |                                  |                          |                              |
| Word and syllable repetition                             | slowed repetition rate            | impaired complex word repetition | impaired word repetition | impaired syllable repetition |
| <b><i>Speech apraxia</i></b>                             |                                   |                                  |                          |                              |
| Qualitative assessment                                   | mild                              | moderate                         | severe                   | very                         |

|                                           |             |             |     |        |
|-------------------------------------------|-------------|-------------|-----|--------|
|                                           |             |             |     | severe |
| Oral apraxia                              | mild        | -           | -   | -      |
| <b>Reading</b>                            |             |             |     |        |
| Word reading from BDAE / 30               | 29          | 29          | 27  | -      |
| Sentence reading from BDAE / 10           | 10          | 7           | 7   | -      |
| <b>Writing</b>                            |             |             |     |        |
| Primer level dictation from BDAE / 15     | 15          | 15          | 15* | -      |
| Writing words to dictation from BDAE / 10 | 10          | 10          | -   | -      |
| Written picture naming / 10               | 10          | 10          | -   | -      |
| Written picture description               | agrammatism | agrammatism | -   | -      |
| Sentence copy                             | preserved   | preserved   | -   | -      |

BDAE, Boston Diagnostic Aphasia Examination; BNT, Boston Naming Test; PALS, Progressive Aphasia Language Scale; SydBAT, Sydney Language Battery

\*expressive (both oral and written) language assessment was very limited due to severe speech apraxia and limb apraxia; \*\*written with the left hand

**Neuropsychological assessment Table S7.** Visuospatial, calculation, memory and executive function evaluation results in the proband

|                                                          | The patient’s age – years, months |                  |                        |      |
|----------------------------------------------------------|-----------------------------------|------------------|------------------------|------|
|                                                          | 67,2                              | 68,4             | 69,3                   | 70,2 |
| <b>Visuospatial function</b>                             |                                   |                  |                        |      |
| VOSP- Incomplete letters / 20                            | 18                                | 17               | 18                     | -    |
| VOSP- Dot counting / 10                                  | 10                                | 9                | 8                      | 5    |
| VOSP- Position discrimination/ 20                        | 20                                | 19               | 18                     | -    |
| VOSP- Number location/ 10                                | 10                                | 7                | 3                      | -    |
| VOSP- Cube analysis / 10                                 | 10                                | 8                | 9                      | 4    |
| CFT copy – Rey / Taylor / 36                             | 34                                | 25               | -                      | -    |
| Benton three-dimensional praxis / 29                     | -                                 | 28               | 27                     | -    |
| Line cancellation                                        | -                                 | -                | 1 right-sided omission | -    |
| BIT – letter cancellation / 20* - 20**                   | -                                 | -                | 14 - 15                | -    |
| Bell test / 15*- 15**                                    | -                                 | -                | 13 - 11                | -    |
| <b>Calculation</b>                                       |                                   |                  |                        |      |
| Calculation score from WAB (multiple choice format) / 24 | 24                                | 24               | 24                     | 22   |
| Serial sevens / 5                                        | 4                                 | 3                | 1                      | -    |
| <b>Memory</b>                                            |                                   |                  |                        |      |
| <b>Working memory</b>                                    |                                   |                  |                        |      |
| Months forward / 12; time in sec.                        | 12; 19                            | 12; 26           | 10; -                  | -    |
| Months backwards / 12; time in sec.                      | 12; 51                            | 11; 69           | -                      |      |
| TMT A                                                    | -                                 | 233 s.           | -                      |      |
| TMT B                                                    | -                                 | 756 s.; 6 errors | -                      |      |
| <b>Verbal learning</b>                                   |                                   |                  |                        |      |
| 10-word list learning- curve                             | 3-5-4-7-6                         | 4-5-5-5-4        | 4-4-4-4-3              | -    |

|                                                                                                |     |       |     |     |
|------------------------------------------------------------------------------------------------|-----|-------|-----|-----|
| Delayed recall                                                                                 | 5   | 4     | 4   |     |
| Recognition [correct / false positives]                                                        | 10  | 10    | 9   |     |
| <i>Visual memory</i><br>selecting previously shown elements<br>from distractors, accuracy in % | 100 | 100   | 100 | 100 |
| LLT – displacement score (percentile)                                                          | -   | 30    | -   | -   |
| LLT- delayed recall (percentile)                                                               | -   | 30-85 | -   | -   |
| CFT – delayed copy / 36                                                                        | 20  | 21    | -   | -   |
| <b><i>Executive function</i></b>                                                               |     |       |     |     |
| <i>Screening- FAB / 18</i>                                                                     | -   | 8     | 8   | -   |
| <i>Abstract thinking and cognitive flexibility</i><br>Sorting Weigl blocks / % correct         | 73  | 66    | 66  | -   |
| The Brixton Spatial Anticipation Test,<br>scaled score                                         | 2   | 2     | -   |     |

BIT, Behavioural Inattention Test; CFT, Complex Figure Test; FAB, Frontal Assessment Battery; LLT, Location Learning Test; VOSP, Visual Object and Space Perception Test; WAB, Western Aphasia Battery

\*left; \*\* right

**Neuropsychological assessment Table S8.** Praxis, finger identification, orientation in the body schema, cortical sensory loss and tactile recognition evaluation results in the proband (RUP, right upper limb; RLL, right lower limb)

|                                                     | The patient's age – years, months |                     |                                           |                                     |
|-----------------------------------------------------|-----------------------------------|---------------------|-------------------------------------------|-------------------------------------|
|                                                     | 67,2                              | 68,4                | 69,3                                      | 70,2                                |
| <b><i>akinesia / hypokinesia</i></b>                | hypokinesia in RUP                |                     | hypokinesia in RUL and RLL                | akinesia in RUL; hypokinesia in RLL |
| <b><i>Synkinesis (hand-foot, hand-mouth)</i></b>    | present                           | present             | present                                   | present                             |
| <b><i>Alien limb symptoms</i></b>                   | RUL                               | RUL                 | RUL                                       | RUL<br>RLL                          |
| <b><i>Manual dexterity</i></b> - pegboard tasks     |                                   |                     |                                           |                                     |
| 9 Hole Peg test                                     |                                   |                     |                                           |                                     |
| - right hand (time)                                 | 59 sec.; - 10 SD                  | 211 sec.            | impossible                                | impossible                          |
| - left hand (time)                                  | 37 sec. ; - 5 SD                  | 54 sec.             | 93 sec.                                   | 259 sec.                            |
| Purdue Pegboard                                     |                                   |                     |                                           | -                                   |
| - right hand (mean - pegs)                          | 4.66;- 5 SD                       | 2.67;               | impossible                                |                                     |
| - left hand (mean - pegs)                           | 7.66; - 3.5 SD                    | 5.33;               | 3.33                                      |                                     |
| - both hands (mean - pegs)                          | 2; - 4SD                          | 0.67;               | impossible                                |                                     |
| <b><i>Praxis</i></b>                                |                                   |                     |                                           |                                     |
| <b><i>Alternate hand movements</i></b>              | extinction in the right hand      | impossible          | impossible                                | impossible                          |
| <b><i>Spatial praxis</i></b>                        |                                   |                     |                                           | impossible                          |
| Interlocking fingers test / 4                       | 2                                 | 3                   | 0                                         |                                     |
| <b><i>Ideomotor praxis</i></b>                      | impaired mostly in the right hand |                     | moderately impaired also in the left hand | severely impaired                   |
| <b><i>Efferent motor praxis</i></b> (left hand) / 5 | 1                                 | 0                   | -                                         | -                                   |
| <b><i>Lower limb praxis</i></b>                     | preserved                         | impaired in the RLL |                                           | impaired in both lower              |



|                                                   |         |         |                                   |       |
|---------------------------------------------------|---------|---------|-----------------------------------|-------|
|                                                   |         |         |                                   | limbs |
| <b>Benton body schema orientation / 20</b>        | -       | 17      | 7                                 | -     |
| <b>Left-right orientation</b>                     |         |         |                                   |       |
| Manikin test / 32                                 | -       | -       | 18                                | -     |
| <b>Cortical sensory loss</b>                      |         |         |                                   |       |
| <i>Tactile double stimulation</i>                 | -       | -       | no sensory loss,<br>no extinction | -     |
| Recognition of 4 shapes written in a palm         |         |         |                                   | -     |
| - right / 8                                       | 6       | 8       | 7                                 |       |
| - left / 8                                        | 8       | 8       | 8                                 |       |
| <i>Finger recognition</i>                         |         |         |                                   | -     |
| - right hand (with / without visual control) / 10 | 10 / 9  | 10 / 10 | 8 / 7                             |       |
| - left hand (with / without visual control) / 10  | 10 / 10 | 10 / 10 | 10 / 10                           |       |
| <i>Tactile object recognition</i>                 |         |         |                                   | -     |
| - right hand / 10                                 | -       | 9       | 6                                 |       |
| - left hand / 10                                  | -       | 10      | 8                                 |       |

**Table S10.** Clinical phenotypes, biochemical and brain abnormalities observed in carriers of single heterozygous *ATP7B* mutation (Hzgs)

| No | Diagnosis/<br>Clinical<br>phenotype/follow up time                                               | Brain imaging<br>abnormalities<br>(suggestive of<br>free copper<br>accumulation)                              | AAO                  | Cognitive function                           | Biochemical<br>analyses                                                                     | <i>ATP7B</i><br>Mutation                                          | reference |
|----|--------------------------------------------------------------------------------------------------|---------------------------------------------------------------------------------------------------------------|----------------------|----------------------------------------------|---------------------------------------------------------------------------------------------|-------------------------------------------------------------------|-----------|
| 1  | Asymptomatic*                                                                                    | n.a.                                                                                                          | -                    | n.a.                                         | serum ceruloplasmin decreased in 3 out of 12 Hzc; serum copper decreased in 1 out of 12 Hzc |                                                                   | [1]       |
| 2  | Asymptomatic*                                                                                    | n.a.                                                                                                          | -                    | n.a.                                         | serum ceruloplasmin decreased in 16 out of 16 Hzc                                           |                                                                   | [2]       |
| 3  | Asymptomatic*                                                                                    | changes in MRS in both the pallidum and thalami compared to control subjects                                  | -                    | n.a.                                         | n.a.                                                                                        |                                                                   | [1]       |
| 4  | Asymptomatic*                                                                                    | more frequent bilateral lenticular nucleus and substantia nigra hyperechogenicity than in control individuals | -                    | n.a.                                         | n.a.                                                                                        |                                                                   | [3]       |
| 5  | EOPD;<br><br>Very slowly progressing levodopa-responsive hemiparkinsonism and dysarthria/7 years | n.a.                                                                                                          | 39                   | preserved in MMSE**,<br><br>CDT*** , FAB**** | lower serum ceruloplasmin;<br><br>elevated serum nonceruloplasmin copper                    | C1079G/exon 14<br><br>SIFT:0.05;<br>Poly-Phen2: 0.999;<br>CADD:32 | [4]       |
| 6  | LOPD; major depression and parkinsonism (three sisters)                                          | n.a.                                                                                                          | 67,<br><br>69,<br>70 | preserved in MMSE                            | n.a.                                                                                        | (-441/-427 del) 15 bp deletion in the 5' UTR region               | [5]       |
| 7  | EOPD; 65-year-old patient                                                                        | n.a.                                                                                                          | 50                   |                                              | n.a.                                                                                        | H1069Q,                                                           | [6]       |

|   |                                                                                                                                                            |                                                                                                                                                                                           |    |                                                                                                                                     |                           |                                                                                  |                 |
|---|------------------------------------------------------------------------------------------------------------------------------------------------------------|-------------------------------------------------------------------------------------------------------------------------------------------------------------------------------------------|----|-------------------------------------------------------------------------------------------------------------------------------------|---------------------------|----------------------------------------------------------------------------------|-----------------|
|   | presented advanced PD with end-of-dose akinesia and intermittent L-dopa-induced dyskinesias under a predominantly dopaminergic therapy.                    |                                                                                                                                                                                           |    |                                                                                                                                     |                           | this mutation was also present in asymptomatic 52-year-old sister of the patient |                 |
| 8 | Wilson's disease; limb weakness and tremor, after 1 year treatment of penicillamine (metal chelator) weakness of the upper limbs and tremor were relieved. | n.a.                                                                                                                                                                                      | 30 |                                                                                                                                     | lower serum ceruloplasmin | R827Q/exon 10                                                                    | [7]             |
| 9 | Our patient: CBS=NAV                                                                                                                                       | cortical atrophy of the both frontal lobes, T1- and T2-weighted MRI images didn't reveal any hyper- and hypointensities in the basal ganglia. MRS and transcranial US were not performed. | 63 | corticobasal syndrome, non-fluent aphasia, apraxia of speech, right-sided hemi-spatial neglect, limb apraxia, executive dysfunction | n.a.                      | H1069Q/exon 14                                                                   | this manuscript |

AAO – age at onset

\*- carriers of single heterozygous *ATP7B* mutation (Hzcs) were recruited from WD patients' families

\*\*MMSE - Mini-Mental State Examination

\*\*\* - Clock Drawing Test

\*\*\*\*- Frontal Assessment Battery

MRS- Magnetic resonance spectroscopy ;

Only in case no 5, the clinical symptoms of EOPD were accompanied by typical biochemical hallmarks of the Wilson's disease (Ilyechova et al. 2019) speaking in favor of the causative role of exon 14 *ATP7B* mutation.

## References:

1. Tarnacka, B.; Szeszkowski, W.; Buettner, J.; Golebiowski, M.; Gromadzka, G.; Czlonkowska, A. Heterozygous carriers for Wilson's disease--magnetic spectroscopy changes in the brain. *Metab Brain Dis* **2009**, *24*, 463-468,
2. Manoochehri, J.; Masoumi Dehshiri, R.; Faraji, H.; Mohammadi, S.; Dastsooz, H.; Moradi, T.; Rezaei, E.; Sadeghi, K.; Fardaei, M. Family screening for a novel ATP7B gene mutation, c.2335T>G, in the South of Iran. *Iran J Ped Hematol Oncol* **2014**, *4*, 26-31,
3. Skowronska, M.; Litwin, T.; Kurkowska-Jastrzebska, I.; Czlonkowska, A. Transcranial sonography changes in heterozygotic carriers of the ATP7B gene. *Neurol Sci* **2020**, *41*, 2605-2612,
4. Ilyechova, E.Y.; Miliukhina, I.V.; Karpenko, M.N.; Orlov, I.A.; Puchkova, L.V.; Samsonov, S.A. Case of Early-Onset Parkinson's Disease in a Heterozygous Mutation Carrier of the ATP7B Gene. *J Pers Med* **2019**, *9*,
5. Sechi, G.; Antonio Cocco, G.; Errigo, A.; Deiana, L.; Rosati, G.; Agnetti, V.; Stephen Paulus, K.; Mario Pes, G. Three sisters with very-late-onset major depression and parkinsonism. *Parkinsonism Relat Disord* **2007**, *13*, 122-125,
6. Moller, J.C.; Leinweber, B.; Rissling, I.; Oertel, W.H.; Bandmann, O.; Schmidt, H.H. Prevalence of the H1069Q mutation in ATP7B in discordant pairs with early-onset Parkinson's disease. *Mov Disord* **2006**, *21*, 1789-1790,
7. Zhang, Z.; Liu, J.; Zheng, W.; Hou, Q.; Zhang, L. A novel heterozygous carrier of ATP7B mutation with muscle weakness and tremor: A Chinese Case Report. *J Musculoskelet Neuronal Interact* **2020**, *20*, 614-618,
